# Supplementary material
Source: PubMed Central journal article supplement (PMC3044461)
Supplement: NIHMS31494-supplement-legend.pdf [file NIHMS31494-supplement-legend.pdf]

**Supplementary Figure 1: Box plot of lesion numbers in the wildtype, *UroII CRE<sup>+</sup>  $\beta$ -catenin<sup>exon3/+</sup>* and *UroII CRE<sup>+</sup>  $\beta$ -catenin<sup>exon3/exon3</sup>***

Box plot of lesion numbers in the wildtype, *UroII CRE<sup>+</sup>  $\beta$ -catenin<sup>exon3/+</sup>* and *UroII CRE<sup>+</sup>  $\beta$ -catenin<sup>exon3/exon3</sup>* cohorts at 3, 12 and 18 months of age (n=3). We show that at 3, 12 and 18 months the number of lesions in the *UroII CRE<sup>+</sup>  $\beta$ -catenin<sup>exon3/+</sup>* (e3/+) and *UroII CRE<sup>+</sup>  $\beta$ -catenin<sup>exon3/exon3</sup>* (e3/e3) are significantly higher than the corresponding wildtype (WT) time point (\*, p<0.001, Mann Whitney Test). Similarly lesions at both 12 and 18 months in the *UroII CRE<sup>+</sup>  $\beta$ -catenin<sup>exon3/+</sup>* and *UroII CRE<sup>+</sup>  $\beta$ -catenin<sup>exon3/exon3</sup>* cohorts are significantly higher than the corresponding cohort at 3 months (#, p<0.001, Mann Whitney Test).

**Supplementary Figure 2: Proliferation of lesions in Rapamycin treated mice versus vehicle control**

Boxplot indicating reduction in percentage of BrdU positive cells in bladder tumours treated with Rapamycin versus those treated with vehicle control (p<0.01, Mann Whitney Test).

**Supplementary Figure 3: Histology of *AhCreER<sup>T</sup> GSK3 $\alpha$  $\beta$ <sup>fl/fl</sup>* mice**

*AhCreER<sup>T</sup> GSK3 $\alpha$  $\beta$ <sup>fl/fl</sup>* mice reveal bladder lesions (A), which demonstrate proliferation as well as accumulation of nuclear  $\beta$ -catenin and PTEN (B-D).

Box plot of average number of BrdU positive cells per lesion in both *AhCreER<sup>T</sup> APC<sup>fl/fl</sup>* and *AhCreER<sup>T</sup> APC<sup>fl/fl</sup> PTEN<sup>fl/fl</sup>* mice of each cohort at 7 days after first induction (n=3) (E).

Black bar measures 200µm (20x magnification).

#### **Supplementary Figure 4: Histology of *UroII CRE<sup>+</sup> PTEN<sup>fl/fl</sup>* mice**

Comparison of 12 month old wildtype and *UroII CRE<sup>+</sup> PTEN<sup>fl/fl</sup>* urothelium. The H&E demonstrates that the urothelium of *UroII CRE<sup>+</sup> PTEN<sup>fl/fl</sup>* (B) is comparable to wildtype (A) with no hyperplasia, dysplasia or tumour formation. We notice lower levels of PTEN in the *UroII CRE<sup>+</sup> PTEN<sup>fl/fl</sup>* urothelium (D) in comparison to wildtype (C) with similar levels of pAkt(Ser473) (E,F) .

Black bar measures 200µm (20x magnification).

#### **Supplementary Figure 5: Boxplot of Histoscore of total Akt and total mTOR in *UroII CRE<sup>+</sup> β-catenin<sup>exon3/exon3</sup>* and *UroII CRE<sup>+</sup> β-catenin<sup>exon3/exon3</sup> PTEN<sup>fl/fl</sup>* mice**

Histoscore of age matched lesions in *UroII CRE<sup>+</sup> β-catenin<sup>exon3/exon3</sup>* (e3/e3) and *UroII CRE<sup>+</sup> β-catenin<sup>exon3/exon3</sup> PTEN<sup>fl/fl</sup>* (fl/fl) demonstrates no statically significant increase in total Akt (p=0.19) (A) and total mTOR (p=0.07) (B) using the Mann Whitney Test.

**Supplementary Figure 6: *UroII*CRE<sup>+</sup>  $\beta$ -catenin<sup>exon3/exon3</sup> *PTEN*<sup>fl/fl</sup> mice treated with Rapamycin**

Addition IHC for pmTOR reveals significant downregulation of this pathway in *UroII*CRE<sup>+</sup>  $\beta$ -catenin<sup>exon3/exon3</sup> *PTEN*<sup>fl/fl</sup> mice after treatment with Rapamycin (A,B). Similarly we also demonstrate that p-4EBP1 and p-S6 Kinase, a know target of the mTOR pathway, is downregulated after treatment (C-F).

Black bar represents 100 $\mu$ m (all magnifications at 40x).

**Supplementary Figure 7: Proliferation of tumours in Rapamycin treated mice versus vehicle control**

Boxplot indicating reduction of BrdU positive cells per 20x field view of bladder tumours treated with Rapamycin versus those treated with vehicle control (p<0.05, Mann Whitney Test) (A). Boxplot demonstrating reduction in percentage of BrdU positive cells in tumours and (*UroII*CRE<sup>+</sup>  $\beta$ -catenin<sup>exon3/exon3</sup> *PTEN*<sup>fl/fl</sup>) and lesions (*UroII*CRE<sup>+</sup>  $\beta$ -catenin<sup>exon3/exon3</sup>) after treatment with Rapamycin (B).
